# Supplementary material for: NgR1: A Tunable Sensor Regulating Memory Formation, Synaptic, and Dendritic Plasticity
Source: PubMed Central journal article supplement — Cereb Cortex. 2016 Feb 2;26(4):1804–17. doi: 10.1093/cercor/bhw007 (PMC4785958; doi:10.1093/cercor/bhw007), 2016-02-02

# Supplementary Figure 6

Saline

Cocaine

Control NgR1 overexpressing

Control NgR1 overexpressing

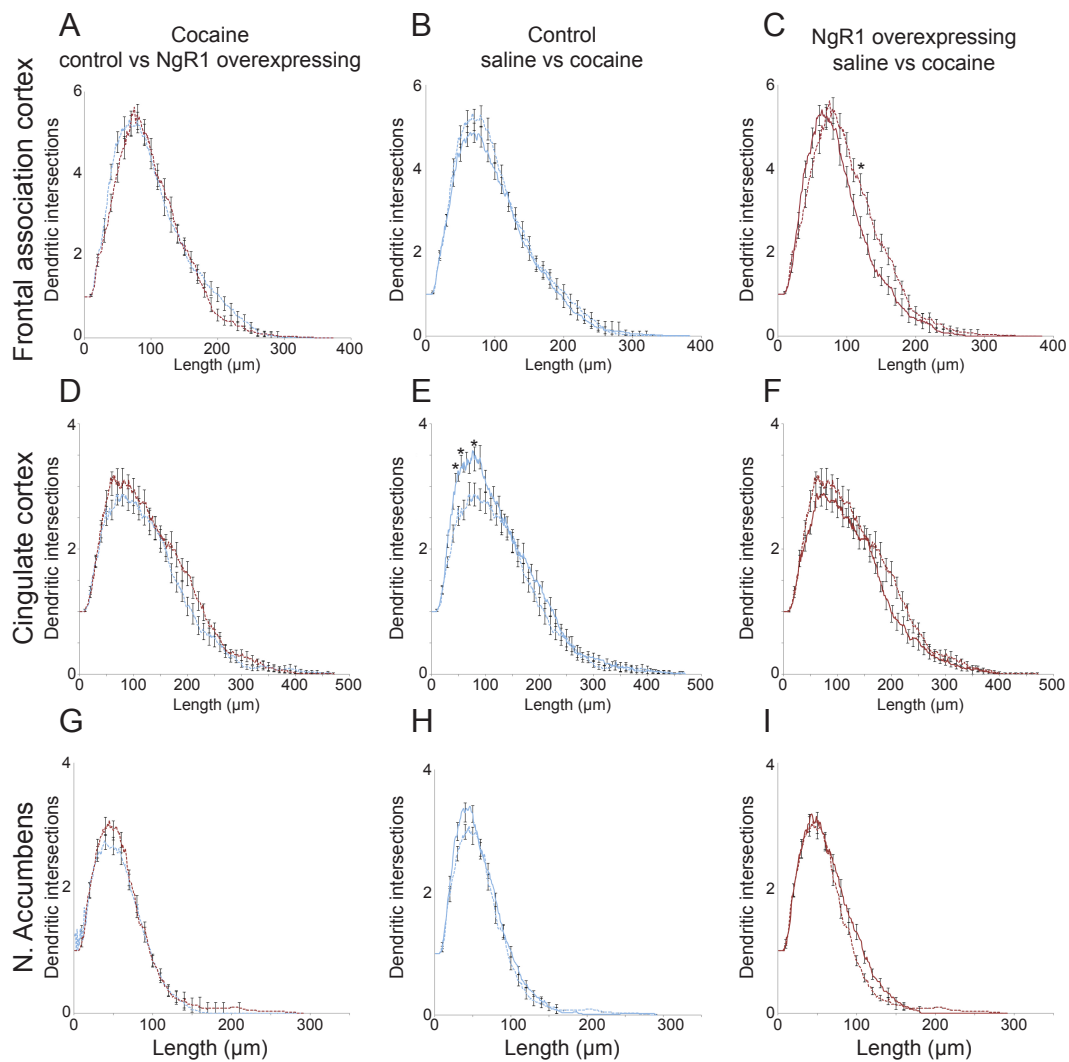

Supplement: supp_bhw007_bhw007supp_fig6.pdf [file supp_bhw007_bhw007supp_fig6.pdf]
