# Supplementary figures and images for: NgR1: A Tunable Sensor Regulating Memory Formation, Synaptic, and Dendritic Plasticity
Source: PubMed Central journal article supplement — Cereb Cortex. 2016 Feb 2;26(4):1804–17. doi: 10.1093/cercor/bhw007 (PMC4785958; doi:10.1093/cercor/bhw007), 2016-02-02

Supplementary Figure 1

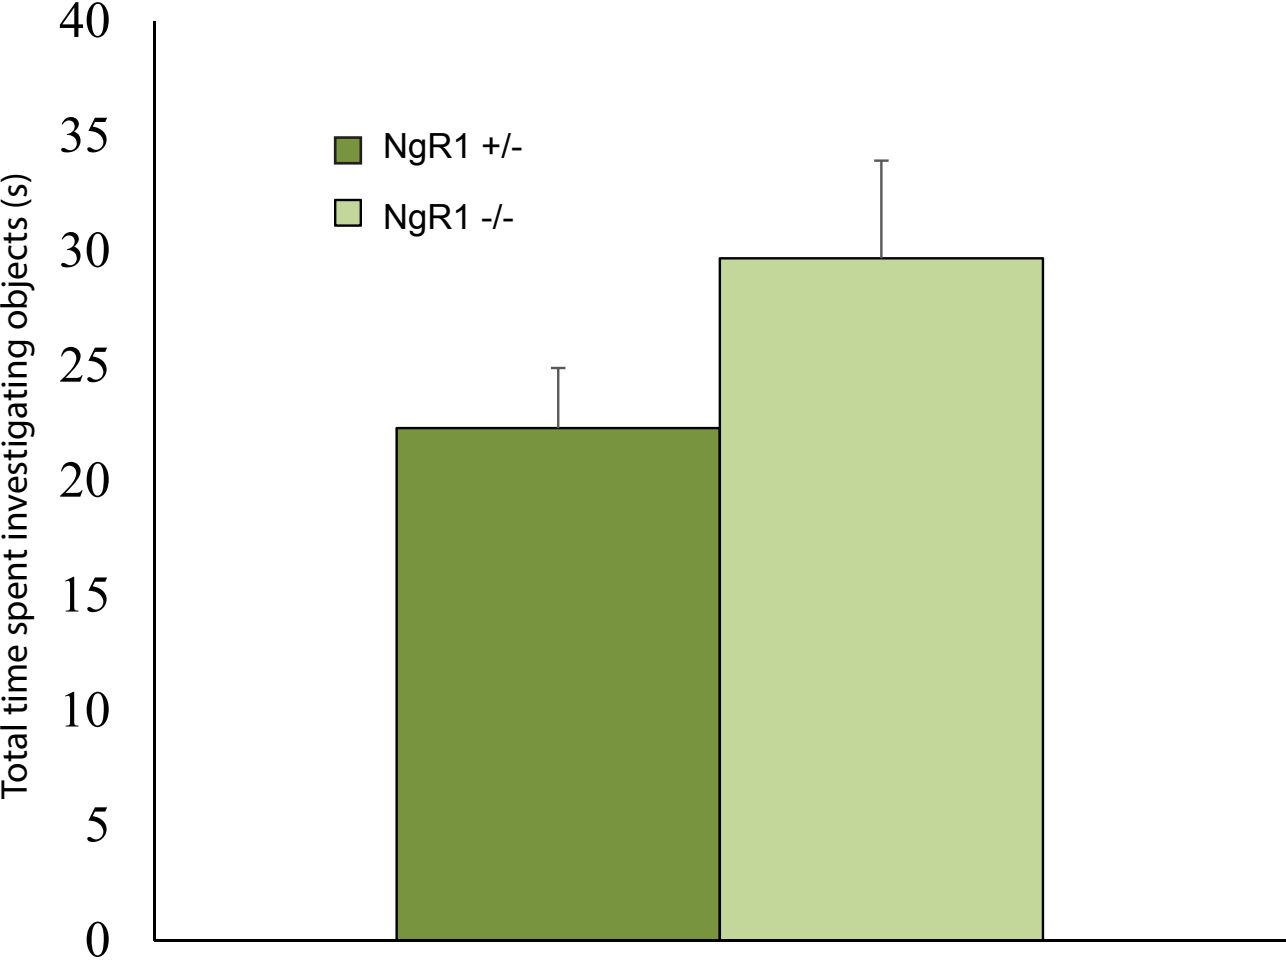

Supplement: supp_bhw007_bhw007supp_fig1.pdf [file supp_bhw007_bhw007supp_fig1.pdf]

Supplementary Figure 2

Control NgR1 overexpressing

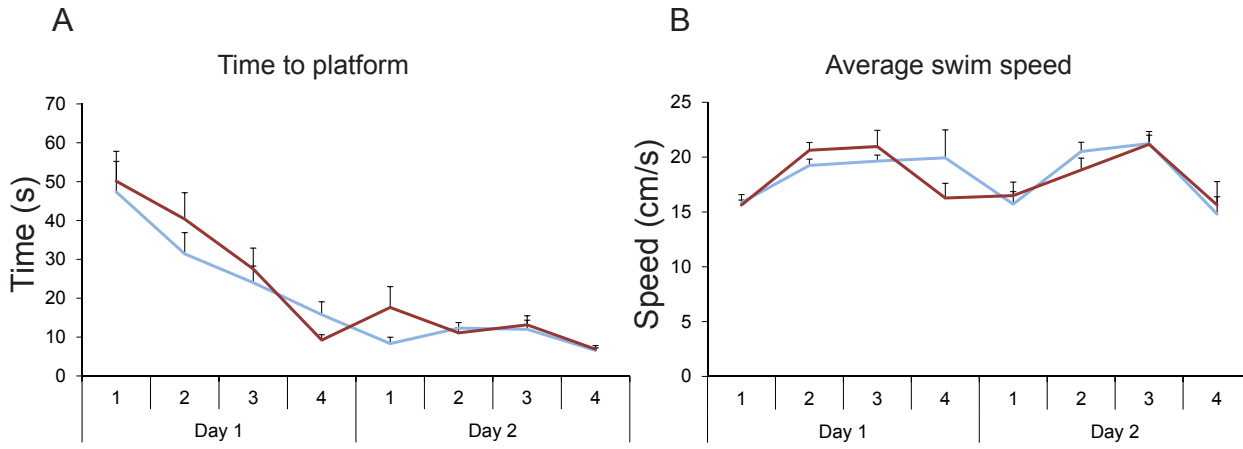

NgR1 +/- NgR1 -/-

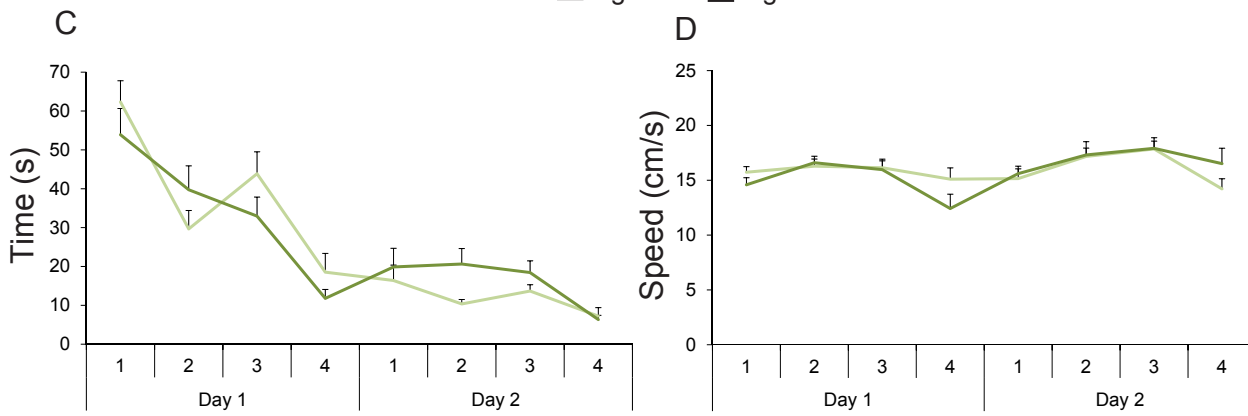

Supplement: supp_bhw007_bhw007supp_fig2.pdf [file supp_bhw007_bhw007supp_fig2.pdf]

Supplementary Figure 3

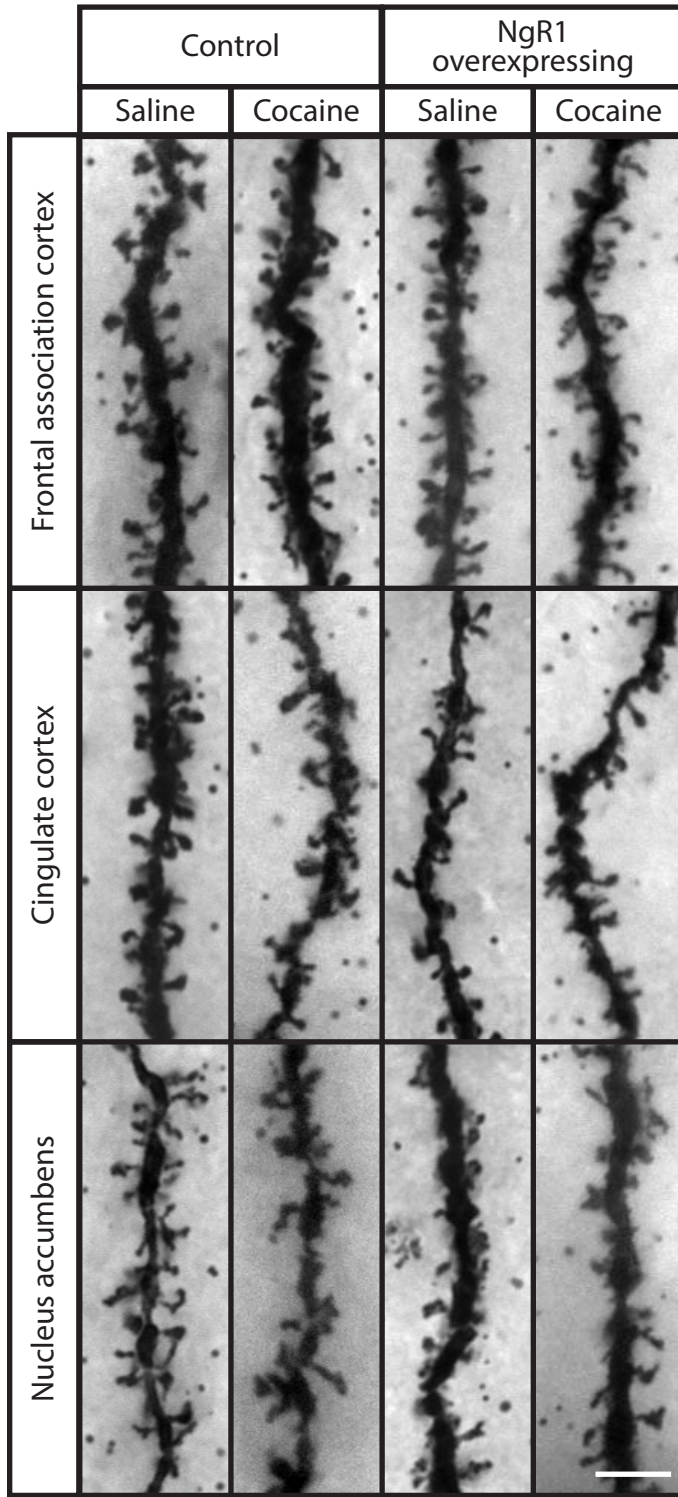

Supplement: supp_bhw007_bhw007supp_fig3.pdf [file supp_bhw007_bhw007supp_fig3.pdf]

Supplementary Figure 4

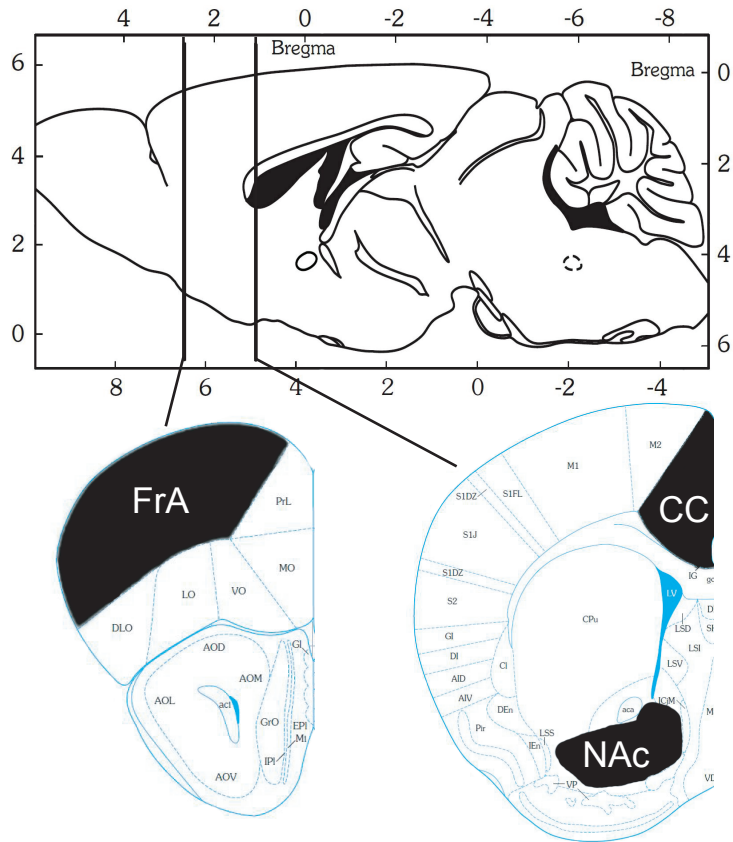

Supplement: supp_bhw007_bhw007supp_fig4.pdf [file supp_bhw007_bhw007supp_fig4.pdf]

Supplementary Figure 5

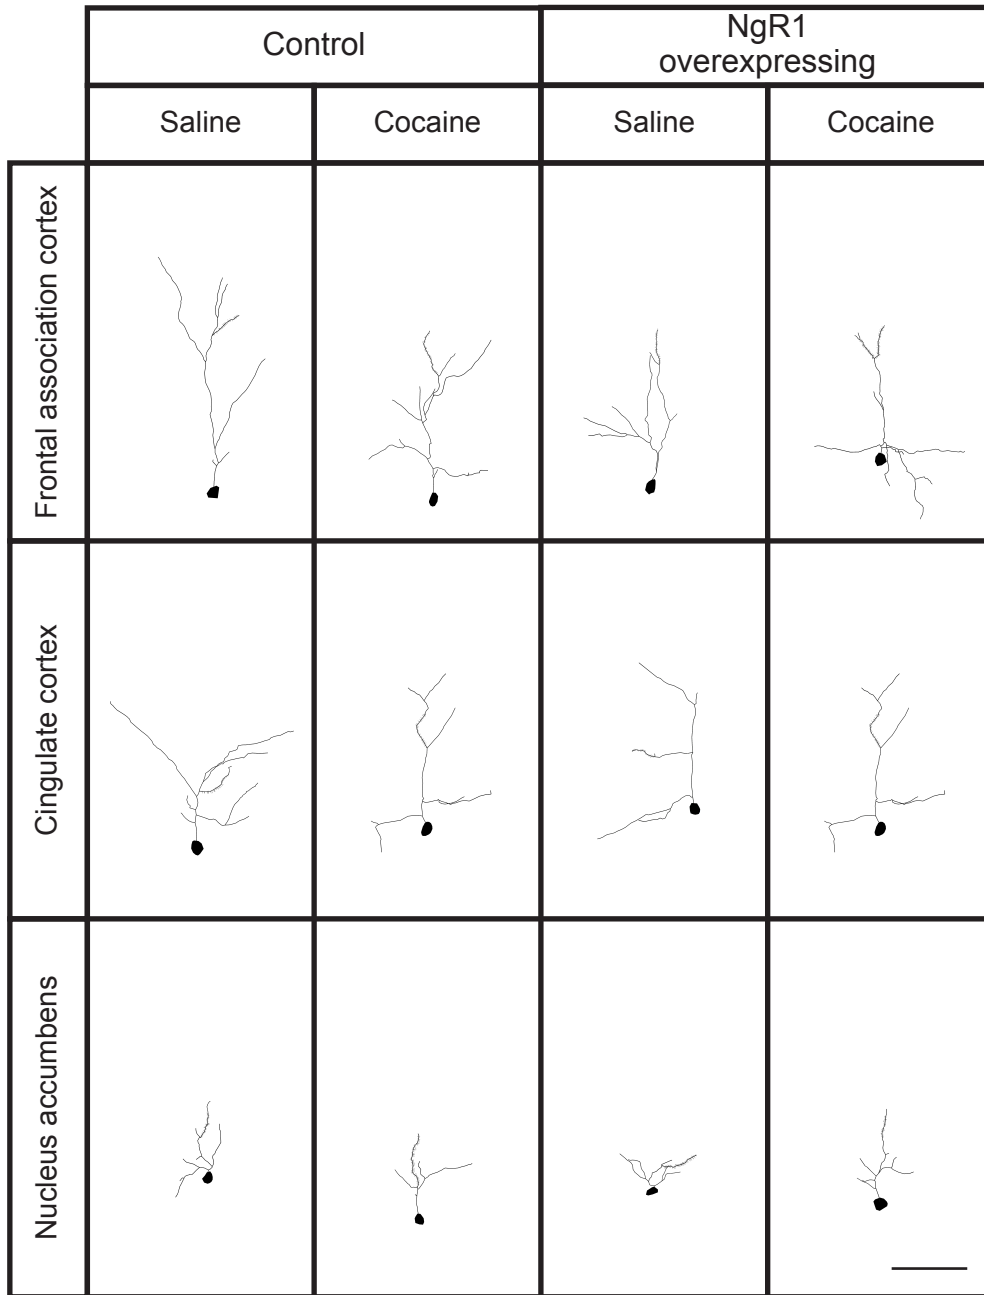

Supplement: supp_bhw007_bhw007supp_fig5.pdf [file supp_bhw007_bhw007supp_fig5.pdf]
